# Supplementary material
Source: HighWire-hosted journal article supplement (https://diabetes.diabetesjournals.org/content/suppl/2005/11/28/54.12.3453)
Supplement: pg3453AppendixTable1.pdf [file pg3453AppendixTable1.pdf]

Appendix Table 1. Flow cytometric analysis of thymic stromal cell content

| <b>Stromal subtype</b>                       | <b>Characterized by:</b>                                    | <b>Cell Number (% of CD45<sup>+</sup> stroma)</b> |                                         |
|----------------------------------------------|-------------------------------------------------------------|---------------------------------------------------|-----------------------------------------|
| Total thymic cellularity                     | Forward/side scatter and propidium iodide exclusion         | NOD <sup>*</sup>                                  | 2.52x10 <sup>8</sup> ±0.43              |
|                                              |                                                             | <i>Idd11D</i> <sup>†</sup>                        | 2.54x10 <sup>8</sup> ±0.06              |
| Total stromal cellularity                    | EPCAM <sup>+</sup> , CD45 <sup>-</sup>                      | NOD                                               | 2.76x10 <sup>6</sup> ±1.08              |
|                                              |                                                             | <i>Idd11D</i>                                     | 3.48x10 <sup>6</sup> ±0.62              |
| Cortical Epithelium                          | EPCAM <sup>+</sup> , CD45 <sup>-</sup> , Ly51 <sup>+</sup>  | NOD                                               | 1.13x10 <sup>6</sup> ±0.27 (34.44±0.88) |
|                                              |                                                             | <i>Idd11D</i>                                     | 1.29x10 <sup>6</sup> ±0.09 (33.54±0.89) |
| Medullary Epithelium                         | EPCAM <sup>+</sup> , CD45 <sup>-</sup> , UEA1 <sup>+</sup>  | NOD                                               | 1.19x10 <sup>6</sup> ±0.29 (36.24±0.89) |
|                                              |                                                             | <i>Idd11D</i>                                     | 1.45x10 <sup>6</sup> ±0.03 (37.94±2.22) |
| Fibroblasts                                  | EPCAM <sup>+</sup> , CD45 <sup>-</sup> , MTS15 <sup>+</sup> | NOD                                               | 0.42x10 <sup>6</sup> ±0.16 (16.32±6.93) |
|                                              |                                                             | <i>Idd11D</i>                                     | 0.48x10 <sup>6</sup> ±0.03 (14.16±3.49) |
| Purported thymic epithelial progenitor cells | EPCAM <sup>+</sup> , CD45 <sup>-</sup> , MTS24 <sup>+</sup> | NOD                                               | 0.62x10 <sup>6</sup> ±0.18 (23.26±2.68) |
|                                              |                                                             | <i>Idd11D</i>                                     | 0.74x10 <sup>6</sup> ±0.06 (21.77±4.70) |

\* n=30

† n=28
