# Supplementary material
Source: HighWire-hosted journal article supplement (https://diabetes.diabetesjournals.org/content/suppl/2005/11/28/54.12.3453)

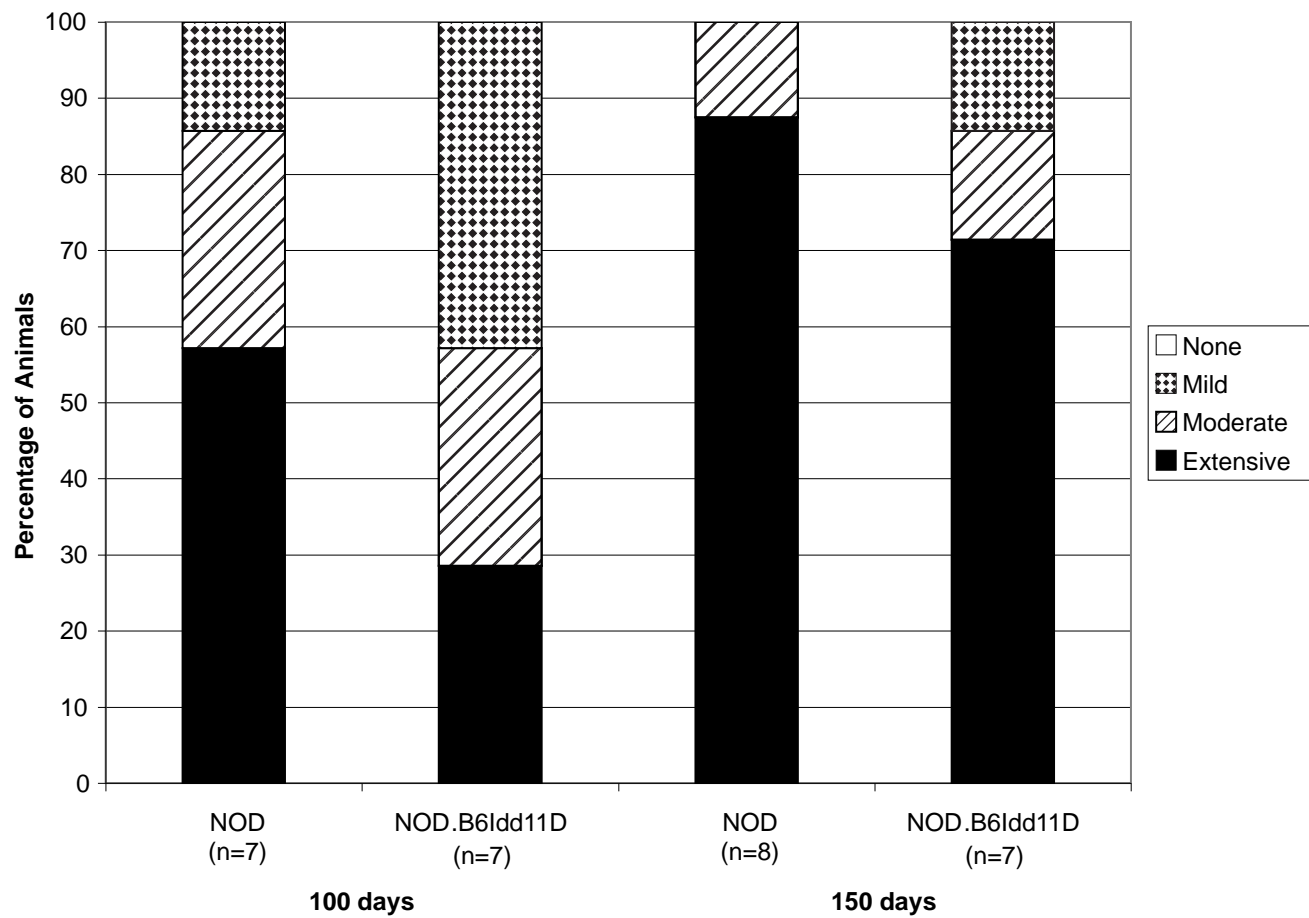

Supplement: pg3453AppendixFig1.pdf [file pg3453AppendixFig1.pdf]
